# Supplementary material for: UV Laser-Induced Photodecomposition of Matrix-Isolated Salicylhydroxamic Acid: Identification of New Isocyanate Complexes
Source: MDPI journal article supplement (doi:10.3390/molecules29040862), 2024-02-15

## Supplementary data

### UV laser induced photodecomposition of matrix isolated salicylhydroxamic acid: identification of new isocyanate complexes

Magdalena Sałdyka\*, Zofia Mielke\*

*Faculty of Chemistry, University of Wrocław, F. Joliot-Curie 14, 50-383 Wrocław, Poland*

Figure S1. 2322-1775  $\text{cm}^{-1}$  region in the SHA/Ar matrix during irradiation at wavelengths between 370 and 350 nm

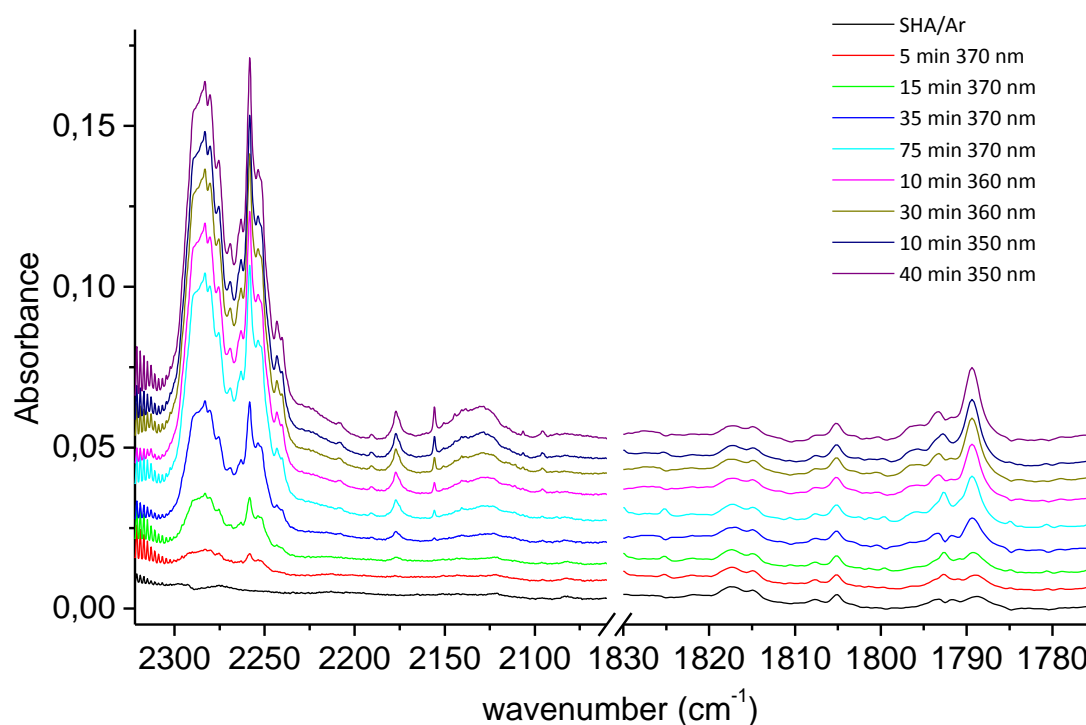

Table S1 Wavenumbers and wavenumbers shifts (in  $\text{cm}^{-1}$ ) calculated for the  $\text{C}_6\text{H}_4(\text{OH})\text{NCO-H}_2\text{O}$  complexes at the B3LYPD3/6-311++G(2d,2p) level of theory. The IR calculated intensities in  $\text{km mol}^{-1}$ .

| 1a   | Int. | $\Delta\nu$ | 1b   | Int. | $\Delta\nu$ | 1c   | Int. | $\Delta\nu$ | 1d   | Int. | $\Delta\nu$ | Assignment                               |
|------|------|-------------|------|------|-------------|------|------|-------------|------|------|-------------|------------------------------------------|
| 3915 | 81   | -8          | 3898 | 131  | -25         | 3910 | 94   | -13         | 3920 | 69   | -3          | $\nu_{\text{as}}\text{OH (H}_2\text{O)}$ |
| 3814 | 10   | -7          | 3755 | 244  | -66         | 3804 | 18   | -17         | 3818 | 13   | -3          | $\nu_{\text{s}}\text{OH (H}_2\text{O)}$  |
| 3576 | 736  | -194        | 3768 | 65   | -2          | 3776 | 72   | 6           | 3774 | 89   | 4           | $\nu\text{OH}$                           |
| 3203 | 6    | -2          | 3204 | 7    | -1          | 3204 | 10   | -1          | 3215 | 1    | 10          | $\nu\text{CH}$                           |
| 3196 | 10   | -2          | 3197 | 1    | -1          | 3197 | 5    | -1          | 3203 | 10   | 5           | $\nu\text{CH}$                           |
| 3180 | 8    | -2          | 3185 | 8    | 3           | 3188 | 6    | 6           | 3190 | 6    | 8           | $\nu\text{CH}$                           |
| 3172 | 0    | -2          | 3176 | 1    | 2           | 3176 | 7    | 2           | 3174 | 8    | 0           | $\nu\text{CH}$                           |
| 2332 | 1577 | 1           | 2329 | 1684 | -2          | 2335 | 1660 | 4           | 2330 | 1682 | -1          | $\nu_{\text{as}}\text{NCO}$              |
| 1642 | 14   | -4          | 1645 | 7    | -1          | 1646 | 1    | 0           | 1644 | 0    | -2          | $\nu\text{C=C, } \delta\text{OH}$        |
| 1637 | 98   | -2          | 1654 | 44   | 15          | 1641 | 132  | 2           | 1640 | 83   | 1           | $\delta\text{OH (H}_2\text{O)}$          |
| 1621 | 66   | -4          | 1628 | 56   | 3           | 1626 | 55   | 1           | 1623 | 53   | -2          | $\nu\text{C=C, } \delta\text{OH}$        |
| 1547 | 123  | 0           | 1550 | 124  | 3           | 1548 | 105  | 1           | 1543 | 125  | -4          | $\nu\text{C-N, } \delta\text{CH}$        |
| 1501 | 6    | 0           | 1501 | 24   | 0           | 1500 | 10   | -1          | 1500 | 10   | -1          | $\delta\text{CH}$                        |
| 1474 | 16   | 2           | 1473 | 13   | 1           | 1473 | 8    | 1           | 1469 | 13   | -3          | $\nu_{\text{s}}\text{NCO}$               |
| 1382 | 70   | 7           | 1375 | 24   | 0           | 1378 | 30   | 3           | 1373 | 28   | -2          | $\delta\text{CH}$                        |
| 1331 | 82   | 10          | 1325 | 35   | 4           | 1321 | 42   | 0           | 1320 | 41   | -1          | $\nu\text{C=C}$                          |
| 1283 | 52   | 5           | 1270 | 86   | -8          | 1285 | 59   | 7           | 1275 | 71   | -2          | $\nu\text{C-O}$                          |
| 1236 | 183  | 12          | 1233 | 173  | 9           | 1224 | 170  | 0           | 1224 | 154  | 0           | $\delta\text{OH}$                        |
| 1191 | 4    | -1          | 1196 | 2    | 4           | 1193 | 7    | 3           | 1189 | 14   | 0           | $\delta\text{CH}$                        |
| 1165 | 16   | 0           | 1173 | 11   | 8           | 1163 | 15   | -1          | 1164 | 13   | 0           | $\delta\text{CH}$                        |
| 1108 | 36   | 5           | 1103 | 20   | 0           | 1102 | 21   | -1          | 1100 | 25   | -3          | $\delta\text{CC}$                        |
| 1058 | 19   | 3           | 1058 | 19   | 3           | 1054 | 16   | 2           | 1051 | 17   | -5          | $\delta\text{CH}$                        |
| 983  | 0    | -3          | 996  | 0    | 10          | 993  | 0    | 6           | 1008 | 0    | 22          | $\gamma\text{CH}$                        |
| 943  | 3    | -4          | 954  | 3    | 7           | 966  | 4    | 20          | 952  | 3    | 1           | $\gamma\text{CH}$                        |
| 865  | 0    | 1           | 876  | 1    | 12          | 875  | 0    | 11          | 880  | 2    | 16          | $\gamma\text{CH}$                        |
| 858  | 10   | 7           | 848  | 14   | -3          | 851  | 14   | 0           | 851  | 11   | 0           | $\delta\text{CC}$                        |
| 757  | 34   | 1           | 761  | 81   | 5           | 765  | 68   | 9           | 765  | 72   | 9           | $\gamma\text{CH}$                        |
| 751  | 22   | -7          | 758  | 32   | 0           | 750  | 28   | -5          | 753  | 26   | -5          | $\delta\text{CC}$                        |
| 742  | 15   | 6           | 737  | 0    | 1           | 742  | 2    | 4           | 744  | 0    | 8           | $\gamma\text{CC}$                        |
| 708  | 134  | 274         | 439  | 86   | 5           | 452  | 94   | 18          | 442  | 85   | 8           | $\gamma\text{OH}$                        |
| 655  | 27   | -7          | 662  | 22   | 0           | 657  | 27   | -3          | 659  | 26   | -3          | $\delta\text{NCO}$                       |
| 583  | 0    | 3           | 579  | 2    | -1          | 578  | 0    | 1           | 578  | 0    | 1           | $\delta\text{CC}$                        |
| 566  | 16   | -2          | 570  | 20   | 2           | 565  | 22   | -4          | 567  | 16   | -1          | $\gamma\text{NCO}$                       |
| 560  | 0    | -1          | 561  | 2    | 0           | 560  | 3    | -1          | 564  | 4    | 3           | $\gamma\text{CC}$                        |

|     |     |    |     |     |    |     |     |    |     |     |    |                    |
|-----|-----|----|-----|-----|----|-----|-----|----|-----|-----|----|--------------------|
| 540 | 6   | 14 | 534 | 58  | 8  | 520 | 8   | -1 | 520 | 10  | -1 | $\delta\text{CCO}$ |
| 464 | 2   | -5 | 464 | 0   | -5 | 468 | 5   | 2  | 468 | 26  | 2  | $\gamma\text{CH}$  |
| 448 | 2   | 3  | 442 | 8   | -3 | 441 | 5   | 0  | 441 | 5   | 0  | $\delta\text{CC}$  |
| 288 | 2   |    | 299 | 3   |    | 288 | 1   |    | 288 | 1   |    | Skeleton def       |
| 275 | 7   |    | 290 | 10  |    | 285 | 5   |    | 284 | 12  |    | Skeleton def       |
| 186 | 16  |    | 193 | 2   |    | 193 | 0   |    | 197 | 0   |    | Skeleton def       |
| 90  | 5   |    | 90  | 20  |    | 88  | 56  |    | 87  | 0   |    | Skeleton def       |
| 55  | 3   |    | 60  | 12  |    | 62  | 2   |    | 55  | 11  |    | Skeleton def       |
| 350 | 22  |    | 500 | 112 |    | 316 | 169 |    | 118 | 108 |    | Intermolecular     |
| 241 | 204 |    | 268 | 96  |    | 222 | 81  |    | 110 | 8   |    | Intermolecular     |
| 152 | 7   |    | 131 | 10  |    | 145 | 8   |    | 103 | 32  |    | Intermolecular     |
| 110 | 47  |    | 114 | 84  |    | 90  | 28  |    | 95  | 17  |    | Intermolecular     |
| 64  | 1   |    | 62  | 8   |    | 73  | 32  |    | 36  | 1   |    | Intermolecular     |
| 24  | 7   |    | 22  | 1   |    | 21  | 3   |    | 6   | 10  |    | Intermolecular     |

Table S2 Anharmonic and harmonic wavenumbers (in  $\text{cm}^{-1}$ ) calculated for the  $\text{C}_6\text{H}_4(\text{OH})\text{NCO}$  molecule at the B3LYPD3/6-311++G(2d,2p) level of theory. The IR calculated intensities expressed in  $\text{km mol}^{-1}$ .

#### Fundamental Bands

| Mode(n) | E(harm)  | E(anharm) | I(harm)       | I(anharm)    |
|---------|----------|-----------|---------------|--------------|
| 1(1)    | 3772.811 | 3582.349  | 90.21511503   | 75.80957453  |
| 2(1)    | 3205.213 | 3074.573  | 4.57236032    | 6.65531635   |
| 3(1)    | 3197.421 | 3051.788  | 8.29877541    | 9.13279681   |
| 4(1)    | 3182.965 | 3085.077  | 6.46848422    | 4.96477617   |
| 5(1)    | 3175.082 | 3024.919  | 0.65349036    | 6.30031072   |
| 6(1)    | 2329.818 | 2292.889  | 1659.78552243 | 857.54649771 |
| 7(1)    | 1645.494 | 1604.704  | 4.65398847    | 6.83479988   |
| 8(1)    | 1625.635 | 1588.631  | 53.35526227   | 34.14319417  |
| 9(1)    | 1546.918 | 1515.600  | 123.71333558  | 76.71766708  |
| 10(1)   | 1501.837 | 1475.960  | 10.41367439   | 5.72596596   |
| 11(1)   | 1471.200 | 1445.823  | 12.68585611   | 7.56987907   |
| 12(1)   | 1374.630 | 1345.047  | 25.12200468   | 4.19333168   |
| 13(1)   | 1321.398 | 1293.836  | 50.94659653   | 38.39906481  |
| 14(1)   | 1278.600 | 1249.192  | 70.14341128   | 48.66466720  |
| 15(1)   | 1224.586 | 1200.254  | 155.96119823  | 105.49055703 |
| 16(1)   | 1191.442 | 1170.013  | 5.98683665    | 1.64077078   |
| 17(1)   | 1164.876 | 1154.503  | 15.71332106   | 19.70336607  |
| 18(1)   | 1103.201 | 1081.390  | 21.49556735   | 18.50285667  |
| 19(1)   | 1052.771 | 1034.307  | 17.69826432   | 11.92577159  |
| 20(1)   | 985.640  | 986.693   | 0.11786964    | 0.02335446   |
| 21(1)   | 944.451  | 944.066   | 3.18487089    | 3.16116160   |
| 22(1)   | 864.845  | 855.744   | 0.75859168    | 0.10794109   |
| 23(1)   | 851.919  | 833.225   | 10.64722612   | 3.75802451   |
| 24(1)   | 756.144  | 749.545   | 71.31569542   | 46.30827381  |
| 25(1)   | 755.860  | 750.168   | 26.29012434   | 24.85094480  |
| 26(1)   | 738.616  | 731.125   | 0.32672763    | 5.56041442   |
| 27(1)   | 660.572  | 655.499   | 26.14769837   | 18.03032349  |
| 28(1)   | 578.770  | 577.921   | 0.39081442    | 0.34520203   |
| 29(1)   | 569.785  | 567.777   | 19.32484229   | 9.71005085   |
| 30(1)   | 561.030  | 559.345   | 1.64303993    | 1.39725772   |
| 31(1)   | 520.496  | 514.256   | 8.00389461    | 6.16799413   |
| 32(1)   | 465.822  | 579.993   | 18.08657393   | 10.65866190  |
| 33(1)   | 443.273  | 416.860   | 78.58103057   | 67.71001903  |
| 34(1)   | 441.731  | 435.444   | 5.58703548    | 5.02976071   |
| 35(1)   | 287.791  | 285.151   | 0.98026020    | 0.82429332   |
| 36(1)   | 283.981  | 281.418   | 11.71341798   | 11.45488136  |
| 37(1)   | 192.082  | 190.535   | 0.01171187    | 0.01148930   |
| 38(1)   | 91.014   | 88.809    | 2.34898898    | 2.29186602   |
| 39(1)   | 58.932   | 61.848    | 0.20953462    | 0.42573772   |

Table S3 Wavenumbers and wavenumbers shifts (in  $\text{cm}^{-1}$ ) calculated for the  $\text{C}_6\text{H}_4(\text{OH})\text{C}(\text{O})\text{N}-\text{H}_2\text{O}$  complexes at the B3LYPD3/6-311++G(2d,2p) level of theory. The IR calculated intensities in  $\text{km mol}^{-1}$ .

| 2a   | Int. | $\Delta\nu$ | 2b   | Int. | $\Delta\nu$ | 2c   | Int. | $\Delta\nu$ | Assignment                                      |
|------|------|-------------|------|------|-------------|------|------|-------------|-------------------------------------------------|
| 3882 | 113  | -41         | 3898 | 72   | -25         | 3902 | 138  | -21         | $\nu_{\text{as}}\text{OH} (\text{H}_2\text{O})$ |
| 3670 | 294  | -151        | 3808 | 21   | -13         | 3769 | 147  | -52         | $\nu_{\text{s}}\text{OH} (\text{H}_2\text{O})$  |
| 3399 | 1027 | -323        | 3709 | 139  | -13         | 3704 | 159  | -18         | $\nu\text{OH}$                                  |
| 3207 | 5    | -1          | 3207 | 9    | -1          | 3207 | 11   | -1          | $\nu\text{CH}$                                  |
| 3202 | 6    | -1          | 3202 | 4    | -1          | 3202 | 4    | -1          | $\nu\text{CH}$                                  |
| 3181 | 4    | -3          | 3190 | 14   | 3           | 3185 | 6    | 1           | $\nu\text{CH}$                                  |
| 3176 | 2    | -2          | 3177 | 7    | 2           | 3179 | 1    | 1           | $\nu\text{CH}$                                  |
| 1775 | 290  | 5           | 1747 | 373  | -23         | 1770 | 310  | 0           | $\nu_{\text{as}}\text{CCN}$                     |
| 1654 | 60   | -4          | 1658 | 91   | -1          | 1660 | 23   | 2           | $\nu\text{C}=\text{C}, \delta\text{OH}$         |
| 1636 | 147  | -3          | 1651 | 30   | 12          | 1648 | 107  | 9           | $\delta\text{OH} (\text{H}_2\text{O})$          |
| 1601 | 42   | -13         | 1612 | 57   | -2          | 1616 | 50   | 2           | $\nu\text{C}=\text{C}, \delta\text{OH}$         |
| 1520 | 118  | -1          | 1524 | 75   | 3           | 1526 | 84   | 8           | $\delta\text{CH}$                               |
| 1508 | 1    | -1          | 1508 | 40   | -1          | 1508 | 50   | -1          | $\delta\text{CH}$                               |
| 1414 | 91   | 28          | 1392 | 31   | 6           | 1391 | 19   | 5           | $\delta\text{CH}, \delta\text{OH}$              |
| 1355 | 36   | 3           | 1352 | 28   | 0           | 1353 | 26   | 1           | $\nu\text{C}=\text{C}, \delta\text{CH}$         |
| 1293 | 84   | 43          | 1250 | 165  | 0           | 1256 | 186  | 6           | $\delta\text{OH}, \delta\text{CH}$              |
| 1275 | 117  | -2          | 1279 | 34   | 2           | 1267 | 22   | -10         | $\nu\text{C}-\text{O}$                          |
| 1232 | 12   | 4           | 1235 | 0    | 7           | 1236 | 2    | 6           | $\nu_{\text{as}}\text{CCO}$                     |
| 1193 | 14   | 1           | 1194 | 5    | 2           | 1200 | 10   | 8           | $\delta\text{CH}$                               |
| 1145 | 44   | -15         | 1166 | 82   | 6           | 1164 | 47   | 4           | $\delta\text{CH}, \nu_{\text{s}}\text{CCO}$     |
| 1129 | 1    | 7           | 1122 | 4    | 0           | 1123 | 1    | 1           | $\delta\text{CH}$                               |
| 1053 | 16   | 3           | 1052 | 16   | 2           | 1055 | 24   | 5           | $\delta\text{CH}$                               |
| 1006 | 0    | 0           | 1017 | 0    | 11          | 1016 | 1    | 10          | $\gamma\text{CH}$                               |
| 973  | 1    | 1           | 998  | 2    | 25          | 978  | 1    | 6           | $\gamma\text{CH}$                               |
| 885  | 2    | 5           | 888  | 1    | 8           | 895  | 3    | 15          | $\gamma\text{CH}$                               |
| 870  | 10   | 10          | 860  | 7    | 0           | 856  | 10   | -4          | $\delta\text{CCC}$                              |
| 799  | 97   | 329         | 484  | 80   | 14          | 452  | 159  | -18         | $\gamma\text{OH}$                               |
| 772  | 87   | -1          | 782  | 52   | 9           | 778  | 44   | 5           | $\gamma\text{CH}$                               |
| 760  | 19   | 8           | 756  | 4    | 4           | 744  | 10   | -8          | $\gamma\text{CH}$                               |
| 730  | 10   | -6          | 733  | 12   | -3          | 736  | 9    | 0           | $\delta\text{CCC}, \delta\text{NCO}$            |
| 633  | 15   | 3           | 640  | 29   | 10          | 630  | 30   | 0           | $\gamma\text{CC}$                               |
| 592  | 19   | 7           | 580  | 10   | -5          | 584  | 18   | -1          | $\delta\text{CCC}, \delta\text{NCO}$            |
| 570  | 2    | 9           | 563  | 0    | 3           | 564  | 2    | 4           | $\delta\text{CCO}$                              |

|     |     |    |     |     |     |     |     |    |                |
|-----|-----|----|-----|-----|-----|-----|-----|----|----------------|
| 536 | 16  | 11 | 530 | 12  | 5   | 525 | 17  | 0  | $\nu$ CH       |
| 522 | 9   | 15 | 494 | 5   | -13 | 510 | 13  | 3  | $\delta$ CCN   |
| 440 | 15  | 28 | 415 | 20  | 3   | 414 | 17  | 2  | $\nu$ CH       |
| 408 | 14  | 44 | 420 | 1   | 8   | 408 | 8   | 44 | $\delta$ CCO   |
| 342 | 6   | 3  | 344 | 42  | 5   | 342 | 3   | 3  | Skeleton def   |
| 240 | 18  | 10 | 230 | 0   | 0   | 230 | 4   | 0  | Skeleton def   |
| 220 | 15  | 43 | 203 | 3   | 26  | 192 | 0   | 15 | Skeleton def   |
| 117 | 1   | -7 | 116 | 17  | 0   | 126 | 1   | 2  | Skeleton def   |
| 65  | 0   | 15 | 56  | 25  | 6   | 46  | 0   | -4 | Skeleton def   |
| 509 | 85  |    | 312 | 476 |     | 444 | 39  |    | Intermolecular |
| 365 | 42  |    | 256 | 2   |     | 281 | 112 |    | Intermolecular |
| 281 | 128 |    | 138 | 29  |     | 121 | 15  |    | Intermolecular |
| 191 | 16  |    | 104 | 25  |     | 97  | 94  |    | Intermolecular |
| 146 | 2   |    | 95  | 6   |     | 73  | 34  |    | Intermolecular |
| 46  | 7   |    | 34  | 0   |     | 23  | 0   |    | Intermolecular |

Table S4 Anharmonic and harmonic wavenumbers (in  $\text{cm}^{-1}$ ) calculated for the  $\text{C}_6\text{H}_4(\text{OH})\text{C}(\text{O})\text{N}$  molecule at the B3LYPD3/6-311++G(2d,2p) level of theory. The IR calculated intensities expressed in  $\text{km mol}^{-1}$ .

#### Fundamental Bands

| Mode(n) | E(harm)  | E(anharm) | I(harm)      | I(anharm)    |
|---------|----------|-----------|--------------|--------------|
| 1(1)    | 3721.929 | 3513.027  | 129.69583062 | 126.07211398 |
| 2(1)    | 3208.418 | 3077.650  | 3.39340087   | 4.86885705   |
| 3(1)    | 3202.896 | 3053.763  | 4.40620307   | 1.75631116   |
| 4(1)    | 3183.954 | 3053.175  | 3.20046076   | 3.97062932   |
| 5(1)    | 3178.244 | 3014.430  | 0.75937044   | 2.33766589   |
| 6(1)    | 1769.722 | 1737.493  | 311.56441466 | 155.39777193 |
| 7(1)    | 1657.692 | 1616.188  | 67.97701199  | 42.69642433  |
| 8(1)    | 1613.530 | 1573.558  | 50.77266085  | 22.47726866  |
| 9(1)    | 1518.878 | 1485.483  | 71.68526073  | 47.78085580  |
| 10(1)   | 1509.347 | 1477.673  | 48.27395204  | 38.94465511  |
| 11(1)   | 1386.193 | 1355.186  | 23.31324296  | 11.10465136  |
| 12(1)   | 1351.931 | 1319.638  | 28.46973743  | 32.60392333  |
| 13(1)   | 1276.659 | 1251.469  | 33.15346237  | 23.45676637  |
| 14(1)   | 1249.838 | 1225.393  | 151.52617021 | 93.84894079  |
| 15(1)   | 1227.715 | 1204.513  | 11.68781396  | 1.46248982   |
| 16(1)   | 1192.547 | 1172.439  | 6.96971968   | 9.87609693   |
| 17(1)   | 1159.999 | 1133.989  | 67.70433895  | 47.92166069  |
| 18(1)   | 1122.257 | 1104.568  | 1.83501828   | 2.49680894   |
| 19(1)   | 1049.616 | 1028.602  | 17.43639731  | 14.84864361  |
| 20(1)   | 1005.521 | 998.640   | 0.29125019   | 0.24880044   |
| 21(1)   | 972.285  | 959.961   | 0.97505602   | 0.31091134   |
| 22(1)   | 880.316  | 876.422   | 2.46143053   | 2.56959677   |
| 23(1)   | 859.762  | 847.926   | 8.20318733   | 8.30634844   |
| 24(1)   | 773.111  | 762.411   | 46.13461963  | 49.76053628  |
| 25(1)   | 751.756  | 792.073   | 7.67731646   | 0.02287167   |
| 26(1)   | 735.670  | 726.728   | 7.41246395   | 5.24648539   |
| 27(1)   | 629.640  | 628.539   | 30.54683953  | 28.29466561  |
| 28(1)   | 584.687  | 579.957   | 14.68051981  | 10.38799004  |
| 29(1)   | 560.625  | 556.123   | 2.45285574   | 1.52148317   |
| 30(1)   | 524.903  | 513.651   | 15.77745631  | 59.97985956  |
| 31(1)   | 507.696  | 504.278   | 10.98408887  | 8.73330282   |
| 32(1)   | 470.103  | 541.557   | 78.13147380  | 11.86029329  |
| 33(1)   | 412.206  | 411.213   | 1.19268986   | 5.04623045   |
| 34(1)   | 409.286  | 407.123   | 2.86183349   | 2.35626430   |
| 35(1)   | 339.113  | 331.696   | 4.46732187   | 2.79688870   |
| 36(1)   | 230.951  | 234.852   | 0.00019406   | 0.00707475   |
| 37(1)   | 176.580  | 175.084   | 5.87563770   | 5.76192946   |

38(1) 124.546 128.884 1.56061147 0.77949514  
 39(1) 49.059 85.590 0.17094330 0.38018930

Table S5 Wavenumbers and wavenumbers shifts (in  $\text{cm}^{-1}$ ) calculated for the  $\text{C}_6\text{H}_4(\text{OH})_2\text{-HNCO}$  complexes at the B3LYPD3/6-311++G(2d,2p) level of theory. The IR calculated intensities in  $\text{km mol}^{-1}$ .

| 3a   | Int. | $\Delta\nu$ | 3b   | Int. | $\Delta\nu$ | 3c   | Int. | $\Delta\nu$ | 3d   | Int. | $\Delta\nu$ | Assignment                              |
|------|------|-------------|------|------|-------------|------|------|-------------|------|------|-------------|-----------------------------------------|
| 3788 | 111  | -64         | 3851 | 90   | -1          | 3669 | 765  | -183        | 3840 | 86   | -12         | $\nu\text{OH}$                          |
| 3763 | 109  | -37         | 3790 | 107  | -10         | 3792 | 92   | -8          | 3809 | 86   | 9           | $\nu\text{OH}$                          |
| 3596 | 215  | -87         | 3498 | 1175 | -185        | 3643 | 162  | -41         | 3548 | 503  | -135        | $\nu\text{NH (HNCO)}$                   |
| 3203 | 4    | 1           | 3205 | 5    | 3           | 3200 | 7    | -2          | 3206 | 3    | 4           | $\nu\text{CH}$                          |
| 3196 | 6    | 3           | 3195 | 9    | 2           | 3190 | 14   | -3          | 3197 | 7    | 4           | $\nu\text{CH}$                          |
| 3182 | 7    | 3           | 3183 | 3    | 4           | 3178 | 9    | -1          | 3183 | 4    | 4           | $\nu\text{CH}$                          |
| 3175 | 0    | 20          | 3160 | 9    | 5           | 3169 | 3    | 4           | 3160 | 7    | 10          | $\nu\text{CH}$                          |
| 2303 | 538  | -12         | 2315 | 931  | 0           | 2313 | 925  | -2          | 2312 | 618  | -3          | $\nu_{\text{as}}\text{NCO (HNCO)}$      |
| 1645 | 4    | -5          | 1656 | 23   | 6           | 1651 | 23   | 1           | 1648 | 13   | -2          | $\nu\text{C}=\text{C}, \delta\text{OH}$ |
| 1632 | 43   | -12         | 1644 | 34   | 0           | 1641 | 40   | -3          | 1646 | 13   | 4           | $\nu\text{C}=\text{C}, \delta\text{OH}$ |
| 1580 | 117  | -5          | 1587 | 108  | 2           | 1588 | 100  | 3           | 1583 | 97   | -2          | $\delta\text{CH}, \delta\text{CC}$      |
| 1504 | 10   | -4          | 1510 | 30   | 2           | 1509 | 42   | 1           | 1508 | 24   | 0           | $\delta\text{CH}$                       |
| 1392 | 31   | 0           | 1392 | 48   | 0           | 1397 | 51   | 5           | 1383 | 23   | -9          | $\delta\text{CH}, \delta\text{OH}$      |
| 1348 | 26   | -14         | 1362 | 44   | 0           | 1380 | 68   | 18          | 1358 | 34   | -4          | $\delta\text{CH}, \delta\text{OH}$      |
| 1322 | 5    | -4          | 1330 | 10   | 4           | 1322 | 2    | -4          | 1327 | 2    | 1           | $\nu_{\text{s}}\text{NCO (HNCO)}$       |
| 1293 | 147  | -1          | 1294 | 113  | 0           | 1293 | 144  | -1          | 1295 | 167  | 1           | $\nu_{\text{s}}\text{C-O}$              |
| 1285 | 74   | 20          | 1261 | 215  | -4          | 1275 | 110  | 10          | 1256 | 72   | -9          | $\nu_{\text{as}}\text{C-O}$             |
| 1219 | 85   | 13          | 1213 | 25   | 4           | 1216 | 93   | 10          | 1203 | 51   | -3          | $\delta\text{OH}, \delta\text{CH}$      |
| 1186 | 3    | -1          | 1191 | 7    | 4           | 1186 | 2    | -1          | 1189 | 13   | 2           | $\delta\text{CH}$                       |
| 1193 | 94   | 22          | 1173 | 67   | 2           | 1190 | 90   | 19          | 1173 | 78   | 2           | $\delta\text{OH}, \delta\text{CH}$      |
| 1115 | 32   | 4           | 1112 | 70   | 1           | 1118 | 30   | 7           | 1112 | 74   | 1           | $\delta\text{CC}, \delta\text{OH}$      |
| 1048 | 12   | -4          | 1055 | 12   | 3           | 1052 | 16   | 0           | 1053 | 12   | 1           | $\delta\text{CC}$                       |
| 988  | 0    | 21          | 979  | 0    | 12          | 966  | 0    | -1          | 982  | 0    | 15          | $\gamma\text{CH}$                       |
| 948  | 4    | 30          | 932  | 6    | 14          | 924  | 15   | 6           | 934  | 4    | 16          | $\gamma\text{CH}$                       |
| 849  | 223  | 35          | 875  | 275  | 62          | 910  | 278  | 96          | 904  | 215  | 90          | $\delta\text{NH (HNCO)}$                |
| 869  | 20   | 7           | 860  | 51   | 2           | 865  | 29   | 3           | 860  | 5    | -2          | $\delta\text{CC}$                       |
| 868  | 16   | 2           | 850  | 33   | -16         | 852  | 1    | -14         | 855  | 0    | -11         | $\gamma\text{CH}$                       |
| 782  | 20   | 5           | 780  | 24   | 3           | 781  | 20   | 4           | 775  | 23   | -2          | $\delta\text{CC}$                       |
| 764  | 58   | 20          | 750  | 69   | 6           | 746  | 76   | 3           | 750  | 77   | 6           | $\gamma\text{CH}$                       |
| 743  | 6    | 10          | 735  | 4    | 2           | 740  | 2    | 7           | 736  | 1    | 3           | Skeleton def                            |
| 631  | 3    | -5          | 676  | 10   | 40          | 664  | 50   | 28          | 652  | 0    | 16          | $\gamma\text{NCO (HNCO)}$               |
| 592  | 35   | 14          | 636  | 20   | 58          | 632  | 4    | 54          | 626  | 18   | 48          | $\delta\text{NCO (HNCO)}$               |

|     |     |     |     |     |    |     |     |     |     |     |     |                |
|-----|-----|-----|-----|-----|----|-----|-----|-----|-----|-----|-----|----------------|
| 590 | 9   | -1  | 591 | 5   | 0  | 591 | 2   | 0   | 591 | 3   | 0   | $\delta$ CC    |
| 575 | 0   | 5   | 570 | 1   | 0  | 572 | 1   | 2   | 570 | 0   | 0   | Skeleton def   |
| 562 | 8   | 5   | 561 | 14  | 4  | 563 | 6   | 6   | 556 | 3   | -1  | $\delta$ CCO   |
| 522 | 110 | 107 | 406 | 37  | -9 | 534 | 19  | 119 | 481 | 31  | 66  | $\gamma$ OH    |
| 460 | 23  | 3   | 459 | 3   | 2  | 459 | 5   | 2   | 458 | 3   | 1   | Skeleton def   |
| 453 | 0   | 2   | 446 | 10  | -5 | 456 | 5   | 4   | 446 | 19  | -5  | $\delta$ CCC   |
| 315 | 1   | 5   | 323 | 84  | 13 | 330 | 1   | 20  | 307 | 18  | -3  | $\delta$ CCO   |
| 300 | 2   | 8   | 293 | 1   | 1  | 293 | 1   | 1   | 292 | 10  | 0   | Skeleton def   |
| 286 | 127 | 83  | 207 | 82  | 4  | 425 | 107 | 222 | 373 | 223 | 170 | $\gamma$ OH    |
| 197 | 8   | 14  | 188 | 50  | 5  | 189 | 3   | 6   | 200 | 1   | 17  | Skeleton def   |
| 258 | 44  |     | 516 | 105 |    | 182 | 98  |     | 251 | 19  |     | Intermolecular |
| 128 | 5   |     | 132 | 7   |    | 130 | 2   |     | 142 | 2   |     | Intermolecular |
| 113 | 7   |     | 66  | 0   |    | 57  | 4   |     | 75  | 0   |     | Intermolecular |
| 78  | 0   |     | 32  | 1   |    | 51  | 4   |     | 41  | 1   |     | Intermolecular |
| 50  | 0   |     | 12  | 0   |    | 18  | 1   |     | 26  | 0   |     | Intermolecular |
| 34  | 0   |     | 8   | 0   |    | 9   | 2   |     | 11  | 0   |     | Intermolecular |

Table S6 Anharmonic and harmonic wavenumbers (in  $\text{cm}^{-1}$ ) calculated for the  $\text{C}_6\text{H}_4(\text{OH})_2$  molecule at the B3LYPD3/6-311++G(2d,2p) level of theory. The IR calculated intensities expressed in  $\text{km mol}^{-1}$ .

#### Fundamental Bands

| Mode(n) | E(harm)  | E(anharm) | I(harm)      | I(anharm)    |
|---------|----------|-----------|--------------|--------------|
| 1(1)    | 3852.181 | 3664.150  | 80.34842844  | 64.85368609  |
| 2(1)    | 3801.275 | 3601.891  | 98.16540286  | 89.56714515  |
| 3(1)    | 3202.605 | 3096.758  | 6.21929727   | 3.05754420   |
| 4(1)    | 3193.080 | 3059.103  | 11.16799423  | 5.91360651   |
| 5(1)    | 3179.155 | 3033.327  | 4.31477759   | 21.56923944  |
| 6(1)    | 3155.745 | 3012.414  | 10.87596395  | 1.86964995   |
| 7(1)    | 1650.180 | 1605.558  | 19.72891124  | 7.06005894   |
| 8(1)    | 1644.044 | 1602.536  | 28.77701161  | 17.55036674  |
| 9(1)    | 1585.679 | 1545.405  | 106.77154517 | 95.17734764  |
| 10(1)   | 1508.601 | 1472.661  | 31.92221100  | 13.60845166  |
| 11(1)   | 1392.806 | 1358.940  | 32.66429519  | 31.10442879  |
| 12(1)   | 1362.418 | 1328.901  | 50.47165742  | 80.57984241  |
| 13(1)   | 1294.522 | 1263.650  | 165.69437014 | 95.23678244  |
| 14(1)   | 1265.270 | 1239.398  | 112.45080829 | 79.45278768  |
| 15(1)   | 1208.640 | 1204.494  | 52.00156435  | 79.62462997  |
| 16(1)   | 1187.792 | 1166.728  | 6.22315862   | 8.44890992   |
| 17(1)   | 1171.746 | 1146.476  | 78.27114036  | 101.32069107 |
| 18(1)   | 1111.852 | 1071.467  | 70.03670677  | 6.04272225   |
| 19(1)   | 1052.716 | 1034.673  | 13.29695657  | 10.59548995  |
| 20(1)   | 967.389  | 1007.441  | 0.15634881   | 0.10240744   |
| 21(1)   | 918.217  | 956.511   | 4.37684842   | 4.60499053   |
| 22(1)   | 862.766  | 854.247   | 22.55140679  | 17.88563348  |
| 23(1)   | 846.226  | 861.681   | 0.13395143   | 0.14859589   |
| 24(1)   | 777.909  | 767.853   | 21.22580858  | 20.30939801  |
| 25(1)   | 766.457  | 751.504   | 75.03238788  | 20.02887786  |
| 26(1)   | 733.834  | 771.379   | 5.63408258   | 1.21541534   |
| 27(1)   | 591.752  | 582.517   | 2.63947275   | 2.46607826   |
| 28(1)   | 569.170  | 587.473   | 0.33969059   | 0.05164076   |
| 29(1)   | 557.677  | 551.998   | 8.64655725   | 7.15101639   |
| 30(1)   | 457.986  | 508.399   | 0.05125931   | 45.92015833  |
| 31(1)   | 450.800  | 448.186   | 7.17526252   | 7.16477018   |
| 32(1)   | 415.341  | 391.181   | 72.56960559  | 83.56908977  |
| 33(1)   | 310.274  | 313.264   | 4.80037342   | 2.93661156   |
| 34(1)   | 292.446  | 300.618   | 0.40417264   | 3.13311997   |
| 35(1)   | 203.370  | 251.281   | 105.04222722 | 64.35570276  |
| 36(1)   | 183.118  | 216.881   | 31.38903166  | 31.12237373  |

Table S7 Wavenumbers and wavenumbers shifts (in  $\text{cm}^{-1}$ ) calculated for the  $\text{C}_6\text{H}_4(\text{OH})\text{NHOH-CO}$  complexes at the B3LYPD3/6-311++G(2d,2p) level of theory. The IR calculated intensities in  $\text{km mol}^{-1}$ .

| 4a   | Int. | $\Delta\nu$ | 4b   | Int. | $\Delta\nu$ | 4c   | Int. | $\Delta\nu$ | Assignment                  |
|------|------|-------------|------|------|-------------|------|------|-------------|-----------------------------|
| 3845 | 70   | 0           | 3777 | 410  | -68         | 3845 | 70   | 0           | $\nu\text{OH}$              |
| 3747 | 145  | -70         | 3818 | 70   | 1           | 3817 | 75   | 0           | $\nu(\text{N})\text{OH}$    |
| 3540 | 26   | 11          | 3528 | 139  | -1          | 3525 | 22   | -4          | $\nu\text{NH}$              |
| 3215 | 3    | 1           | 3213 | 4    | -1          | 3216 | 3    | 2           | $\nu\text{CH}$              |
| 3196 | 14   | 0           | 3194 | 14   | -2          | 3197 | 12   | 1           | $\nu\text{CH}$              |
| 3179 | 6    | 1           | 3178 | 10   | 0           | 3180 | 6    | 2           | $\nu\text{CH}$              |
| 3154 | 13   | 1           | 3163 | 11   | 10          | 3155 | 11   | 2           | $\nu\text{CH}$              |
| 2217 | 88   | 6           | 2233 | 95   | 22          | 2205 | 59   | -6          | $\nu\text{C}\equiv\text{O}$ |
| 1647 | 18   | -1          | 1645 | 15   | -3          | 1646 | 15   | -2          | $\nu\text{C}=\text{C}$      |
| 1637 | 27   | -1          | 1638 | 38   | 0           | 1637 | 26   | -1          | $\nu\text{C}=\text{C}$      |
| 1540 | 71   | 0           | 1541 | 67   | 1           | 1540 | 70   | 0           | $\delta\text{CH}$           |
| 1517 | 17   | 0           | 1516 | 24   | -1          | 1517 | 20   | 0           | $\delta\text{NH}$           |
| 1480 | 15   | 2           | 1476 | 20   | -2          | 1478 | 16   | 0           | $\delta\text{CH}$           |
| 1417 | 97   | 27          | 1391 | 80   | 1           | 1392 | 90   | 2           | $\delta\text{NOH}$          |
| 1367 | 30   | 3           | 1370 | 63   | 6           | 1366 | 36   | 2           | $\delta\text{OH}$           |
| 1336 | 12   | 0           | 1336 | 8    | 0           | 1336 | 9    | 0           | $\delta\text{CH}$           |
| 1283 | 100  | 1           | 1284 | 92   | 2           | 1284 | 94   | 2           | $\nu\text{C-O}$             |
| 1244 | 13   | 0           | 1254 | 37   | 10          | 1246 | 11   | 2           | $\nu\text{C-N}$             |
| 1194 | 24   | 0           | 1203 | 74   | 9           | 1194 | 24   | 0           | $\delta\text{CH}$           |
| 1183 | 62   | 0           | 1188 | 11   | 5           | 1184 | 60   | 1           | $\delta\text{CH}$           |
| 1123 | 60   | 1           | 1128 | 36   | 6           | 1123 | 53   | 1           | $\delta\text{CCC}$          |
| 1064 | 7    | 0           | 1064 | 7    | 0           | 1065 | 6    | 1           | Ring def                    |
| 1037 | 40   | 9           | 1028 | 46   | 0           | 1030 | 44   | 2           | $\nu\text{N-O}$             |
| 975  | 0    | 3           | 971  | 0    | -1          | 978  | 0    | 6           | $\gamma\text{CH}$           |
| 927  | 7    | 2           | 926  | 9    | 1           | 932  | 8    | 7           | $\gamma\text{CH}$           |
| 895  | 70   | -9          | 906  | 90   | 2           | 905  | 98   | 1           | $\gamma\text{NH}$           |
| 851  | 1    | 2           | 851  | 0    | 2           | 852  | 0    | 1           | $\gamma\text{CH}$           |
| 829  | 27   | -1          | 832  | 32   | 2           | 831  | 30   | 1           | Ring def                    |
| 760  | 68   | -4          | 767  | 78   | 3           | 764  | 87   | 1           | Skeleton def                |
| 749  | 81   | 2           | 748  | 71   | 1           | 750  | 65   | 3           | $\gamma\text{CH}$           |
| 720  | 64   | -1          | 725  | 49   | 14          | 722  | 49   | 1           | Skeleton def                |
| 610  | 5    | 0           | 610  | 4    | 0           | 610  | 5    | 0           | Ring def                    |
| 574  | 7    | 2           | 574  | 5    | 2           | 572  | 5    | 0           | Skeleton def                |



|     |    |     |     |    |     |     |    |   |                                      |
|-----|----|-----|-----|----|-----|-----|----|---|--------------------------------------|
| 536 | 17 | 4   | 536 | 7  | 4   | 533 | 8  | 1 | $\delta\text{CCO}, \delta\text{CNO}$ |
| 523 | 4  | 1   | 524 | 1  | 2   | 522 | 3  | 0 | Ring def                             |
| 482 | 37 | 119 | 364 | 47 | 1   | 363 | 53 | 0 | $\nu(\text{N})\text{OH}$             |
| 451 | 15 | -4  | 454 | 5  | -1  | 457 | 15 | 2 | Skeleton def                         |
| 346 | 5  | 2   | 348 | 19 | 4   | 346 | 12 | 2 | $\delta\text{CCO}$                   |
| 306 | 21 | 12  | 284 | 16 | -10 | 299 | 32 | 5 | Skeleton def                         |
| 279 | 66 | 12  | 487 | 71 | 220 | 272 | 83 | 5 | $\nu\text{OH}$                       |
| 240 | 11 | 8   | 236 | 1  | 4   | 234 | 5  | 2 | $\delta\text{CCN}$                   |
| 188 | 1  | 13  | 175 | 4  | 0   | 178 | 2  | 3 | Skeleton def                         |
| 85  | 2  | -9  | 100 | 1  | 6   | 100 | 1  | 6 | Skeleton def                         |
| 164 | 3  |     | 114 | 0  |     | 116 | 1  |   | Intermolecular                       |
| 141 | 2  |     | 90  | 3  |     | 61  | 0  |   | Intermolecular                       |
| 77  | 1  |     | 76  | 1  |     | 43  | 0  |   | Intermolecular                       |
| 27  | 0  |     | 20  | 0  |     | 27  | 0  |   | Intermolecular                       |
| 15  | 0  |     | 13  | 0  |     | 24  | 0  |   | Intermolecular                       |

Table S8 Anharmonic and harmonic wavenumbers (in  $\text{cm}^{-1}$ ) calculated for the  $\text{C}_6\text{H}_4(\text{OH})\text{NHOH}$  molecule at the B3LYPD3/6-311++G(2d,2p) level of theory. The IR calculated intensities expressed in  $\text{km mol}^{-1}$ .

#### Fundamental Bands

| Mode(n) | E(harm)  | E(anharm) | I(harm)      | I(anharm)   |
|---------|----------|-----------|--------------|-------------|
| 1(1)    | 3845.562 | 3629.031  | 70.03291390  | 57.40148829 |
| 2(1)    | 3817.146 | 3660.971  | 73.87447419  | 53.97756606 |
| 3(1)    | 3528.726 | 3352.747  | 22.30655332  | 16.01184062 |
| 4(1)    | 3214.445 | 3075.770  | 3.07157391   | 4.63788818  |
| 5(1)    | 3195.933 | 3060.680  | 12.97649148  | 11.70511696 |
| 6(1)    | 3178.506 | 3052.601  | 6.22885679   | 2.30830474  |
| 7(1)    | 3153.322 | 3014.221  | 12.55427677  | 17.16655432 |
| 8(1)    | 1646.828 | 1602.559  | 14.72724695  | 8.36648535  |
| 9(1)    | 1637.633 | 1598.341  | 26.78176042  | 16.97328312 |
| 10(1)   | 1539.822 | 1500.165  | 69.09927853  | 45.47272090 |
| 11(1)   | 1516.625 | 1478.616  | 19.24629956  | 10.07724612 |
| 12(1)   | 1476.676 | 1434.826  | 15.57987951  | 0.28275220  |
| 13(1)   | 1389.983 | 1343.017  | 92.11418637  | 62.57760047 |
| 14(1)   | 1363.841 | 1329.134  | 35.72949026  | 29.08938816 |
| 15(1)   | 1335.165 | 1305.569  | 8.48725017   | 5.39541908  |
| 16(1)   | 1281.597 | 1248.742  | 101.93112220 | 28.33835487 |
| 17(1)   | 1243.584 | 1227.789  | 10.31661494  | 41.37741896 |
| 18(1)   | 1193.645 | 1182.058  | 24.34945205  | 22.07972128 |
| 19(1)   | 1183.194 | 1147.092  | 61.49534593  | 24.21609417 |
| 20(1)   | 1122.132 | 1087.915  | 57.71043552  | 22.33904032 |
| 21(1)   | 1064.589 | 1043.242  | 6.39584836   | 4.31765498  |
| 22(1)   | 1028.411 | 993.380   | 45.01730983  | 22.87951683 |
| 23(1)   | 972.569  | 989.803   | 0.16502175   | 0.20518934  |
| 24(1)   | 925.281  | 932.621   | 9.24174783   | 3.26502114  |
| 25(1)   | 904.342  | 877.282   | 91.42895511  | 37.38238719 |
| 26(1)   | 848.605  | 855.491   | 0.21899413   | 0.50888204  |

Table S9 Energy of vertical excitations  $\Delta E$  (nm) and corresponding oscillator strength (f) calculated using TD-DFT (B3LYP/6-311++G(2d,2p)) method.

| $\Delta E$<br>(T1) | f      | $\Delta E$<br>(T2) | f      | $\Delta E$<br>(T3) | f      | $\Delta E$<br>(S1) | f      | $\Delta E$<br>(S2) | f      | $\Delta E$<br>(S3) | f      |
|--------------------|--------|--------------------|--------|--------------------|--------|--------------------|--------|--------------------|--------|--------------------|--------|
| 381                | 0.0000 | 353                | 0.0000 | 314                | 0.0000 | 299                | 0.1282 | 262                | 0.0797 | 239                | 0.0181 |

Table S10 Anharmonic and harmonic wavenumbers (in  $\text{cm}^{-1}$ ) calculated for the ketoketene  $\text{C}_6\text{H}_4(=\text{O})=\text{C}=\text{O}$  molecule at the B3LYP/6-311++G(2d,2p) level of theory. The IR calculated intensities expressed in  $\text{km mol}^{-1}$ .

Fundamental Bands

| Mode(n) | E(harm)  | E(anharm) | I(harm)       | I(anharm)    |
|---------|----------|-----------|---------------|--------------|
| 1(1)    | 3206.709 | 3081.620  | 5.83142681    | 8.64617556   |
| 2(1)    | 3198.668 | 3067.235  | 3.89945653    | 1.22960971   |
| 3(1)    | 3185.989 | 3050.247  | 0.51408633    | 1.21189627   |
| 4(1)    | 3166.652 | 3030.426  | 9.59348811    | 11.94455114  |
| 5(1)    | 2202.384 | 2153.773  | 1225.31567440 | 958.25831626 |
| 6(1)    | 1683.909 | 1648.558  | 272.52330028  | 158.20964118 |
| 7(1)    | 1634.863 | 1607.001  | 125.06581792  | 66.63801302  |
| 8(1)    | 1547.781 | 1510.329  | 168.94892964  | 60.62955435  |
| 9(1)    | 1474.224 | 1443.174  | 11.13385439   | 10.49301439  |
| 10(1)   | 1418.771 | 1389.587  | 18.43913398   | 15.30126209  |
| 11(1)   | 1304.663 | 1277.866  | 59.80125123   | 36.00860124  |
| 12(1)   | 1262.472 | 1227.522  | 8.51999840    | 3.54310828   |
| 13(1)   | 1209.038 | 1188.406  | 13.97076650   | 8.08056204   |
| 14(1)   | 1171.478 | 1155.695  | 27.47922132   | 22.05849920  |
| 15(1)   | 1128.350 | 1107.185  | 7.68096720    | 4.44806698   |
| 16(1)   | 1009.869 | 1015.833  | 0.10006447    | 0.25792125   |
| 17(1)   | 997.641  | 982.706   | 3.80501001    | 3.00275482   |
| 18(1)   | 963.597  | 954.851   | 0.04072314    | 0.03864873   |
| 19(1)   | 869.154  | 856.020   | 4.72634146    | 4.60596900   |
| 20(1)   | 859.860  | 847.940   | 11.73136619   | 9.80400146   |
| 21(1)   | 757.091  | 751.768   | 31.15879732   | 12.83174301  |
| 22(1)   | 729.247  | 715.561   | 31.94725341   | 43.60905209  |
| 23(1)   | 700.370  | 689.648   | 17.66573945   | 16.10394382  |
| 24(1)   | 633.544  | 624.038   | 3.18583085    | 3.27107248   |
| 25(1)   | 578.973  | 569.868   | 12.52294870   | 12.06590013  |
| 26(1)   | 568.398  | 560.222   | 2.99706811    | 2.66652068   |
| 27(1)   | 491.723  | 489.047   | 8.23701758    | 7.50963924   |
| 28(1)   | 456.603  | 449.128   | 5.85256821    | 5.54001592   |
| 29(1)   | 383.902  | 381.410   | 0.26780715    | 0.45192955   |
| 30(1)   | 374.672  | 370.987   | 1.71875774    | 1.28179140   |
| 31(1)   | 192.576  | 188.478   | 1.84411006    | 1.79834317   |
| 32(1)   | 137.132  | 135.482   | 0.97632419    | 0.93706871   |
| 33(1)   | 87.742   | 86.048    | 1.22818034    | 1.22293744   |

Table S11 Selected structural parameters<sup>a</sup> calculated for the C<sub>6</sub>H<sub>4</sub>(OH)NCO-H<sub>2</sub>O complexes at the B3LYPD3/6-311++G(2d,2p) level of theory.

| Property                                                                                                                                    | 1a    | 1b    | 1c     | 1d    |
|---------------------------------------------------------------------------------------------------------------------------------------------|-------|-------|--------|-------|
| r(C <sub>4</sub> N <sub>13</sub> )                                                                                                          | 1.404 | 1.405 | 1.406  | 1.406 |
| r(N <sub>13</sub> C <sub>14</sub> )                                                                                                         | 1.201 | 1.206 | 1.199  | 1.204 |
| r(C <sub>14</sub> O <sub>15</sub> )                                                                                                         | 1.171 | 1.167 | 1.173  | 1.169 |
| r(C <sub>5</sub> O <sub>11</sub> )                                                                                                          | 1.350 | 1.368 | 1.361  | 1.361 |
| r(O <sub>11</sub> H <sub>12</sub> )                                                                                                         | 0.975 | 0.966 | 0.965  | 0.965 |
| r(O <sub>18</sub> H <sub>16</sub> )                                                                                                         | 0.961 | 0.966 | 0.963  | 0.961 |
| r(O <sub>18</sub> H <sub>17</sub> )                                                                                                         | 0.962 | 0.960 | 0.960  | 0.961 |
| r(O <sub>11</sub> H <sub>12</sub> ...O <sub>18</sub> )                                                                                      | 1.867 | -     | -      | -     |
| r(O <sub>18</sub> H <sub>16</sub> ...N <sub>13</sub> ), r(O <sub>18</sub> H <sub>16</sub> ...O <sub>11</sub> )                              | 2.802 | 2.006 | -      | -     |
| r(O <sub>18</sub> H <sub>16</sub> ...O <sub>15</sub> )                                                                                      | 3.567 | -     | 2.276  | -     |
| r(C <sub>6</sub> H <sub>10</sub> ...O <sub>18</sub> ), r(C <sub>3</sub> H <sub>9</sub> ...O <sub>18</sub> )                                 | -     | 2.527 | 2.399  | 2.596 |
| r(O <sub>11</sub> H <sub>12</sub> ...N <sub>13</sub> )                                                                                      | 2.377 | 2.200 | 2.226  | 2.216 |
| φ(C <sub>5</sub> O <sub>11</sub> H <sub>12</sub> )                                                                                          | 113.2 | 108.9 | 108.7  | 108.6 |
| φ(C <sub>5</sub> C <sub>4</sub> N <sub>13</sub> )                                                                                           | 117.9 | 116.5 | 116.6  | 116.6 |
| φ(C <sub>4</sub> N <sub>13</sub> C <sub>14</sub> )                                                                                          | 139.0 | 137.1 | 139.7  | 137.9 |
| φ(N <sub>13</sub> C <sub>14</sub> O <sub>15</sub> )                                                                                         | 173.6 | 174.3 | 174.1  | 174.3 |
| φ(O <sub>11</sub> H <sub>12</sub> ...O <sub>18</sub> )                                                                                      | 161.0 | -     | -      | -     |
| φ(O <sub>18</sub> H <sub>16</sub> ...N <sub>13</sub> ), φ(O <sub>18</sub> H <sub>16</sub> ...O <sub>11</sub> )                              | 97.9  | 159.1 | -      | -     |
| φ(O <sub>18</sub> H <sub>16</sub> ...O <sub>15</sub> ),                                                                                     | 129.7 | -     | 132.0  | -     |
| φ(C <sub>6</sub> H <sub>10</sub> ...O <sub>18</sub> ), φ(C <sub>3</sub> H <sub>9</sub> ...O <sub>18</sub> )                                 |       | 136.4 | 162.6  | 122.2 |
| θ(O <sub>11</sub> H <sub>12</sub> ...O <sub>18</sub> H <sub>16</sub> )                                                                      | 140.1 | 171.8 | -      | -     |
| θ(O <sub>18</sub> H <sub>16</sub> ...N <sub>13</sub> C <sub>14</sub> )                                                                      | 144.9 | -     | -173.3 | -     |
| θ(C <sub>6</sub> H <sub>10</sub> ...O <sub>18</sub> H <sub>16</sub> ), θ(C <sub>3</sub> H <sub>9</sub> ...O <sub>18</sub> H <sub>16</sub> ) | -     | -6.5  | -8.5   | 116.8 |

<sup>a</sup> the interacting atoms refer to the structure 1a presented below;  
the bond distances are given in Å, the angles in degrees.

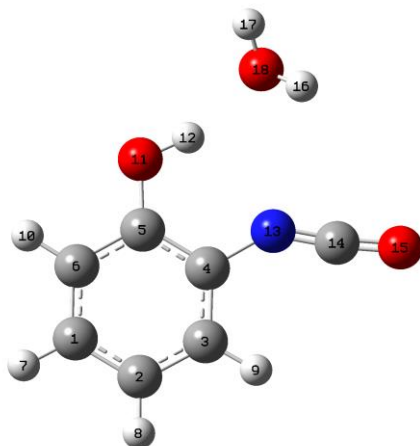

Table S12 Selected structural parameters<sup>a</sup> calculated for the C<sub>6</sub>H<sub>4</sub>(OH)C(O)N-H<sub>2</sub>O complexes at the B3LYPD3/6-311++G(2d,2p) level of theory.

| Property                                                                                                                                                               | 2a     | 2b    | 2c    |
|------------------------------------------------------------------------------------------------------------------------------------------------------------------------|--------|-------|-------|
| r(C <sub>4</sub> C <sub>13</sub> )                                                                                                                                     | 1.438  | 1.438 | 1.437 |
| r(N <sub>13</sub> C <sub>14</sub> )                                                                                                                                    | 1.261  | 1.269 | 1.264 |
| r(C <sub>13</sub> O <sub>12</sub> )                                                                                                                                    | 1.329  | 1.315 | 1.321 |
| r(O <sub>12</sub> N <sub>14</sub> )                                                                                                                                    | 1.742  | 1.790 | 1.770 |
| r(C <sub>5</sub> O <sub>11</sub> )                                                                                                                                     | 1.342  | 1.352 | 1.360 |
| r(O <sub>11</sub> H <sub>15</sub> )                                                                                                                                    | 0.983  | 0.968 | 0.968 |
| r(O <sub>16</sub> H <sub>17</sub> )                                                                                                                                    | 0.961  | 0.962 | 0.960 |
| r(O <sub>16</sub> H <sub>18</sub> )                                                                                                                                    | 0.971  | 0.962 | 0.965 |
| r(O <sub>11</sub> H <sub>15</sub> ...O <sub>16</sub> )                                                                                                                 | 1.750  | -     | -     |
| r(O <sub>16</sub> H <sub>18</sub> ...N <sub>14</sub> ), r(O <sub>16</sub> H <sub>18</sub> ...O <sub>12</sub> ), r(O <sub>16</sub> H <sub>18</sub> ...O <sub>11</sub> ) | 1.917  | 2.537 | 2.052 |
| r(C <sub>6</sub> H <sub>10</sub> ...O <sub>16</sub> ), r(C <sub>3</sub> H <sub>9</sub> ...O <sub>16</sub> )                                                            | -      | 2.338 | 2.423 |
| r(O <sub>11</sub> H <sub>15</sub> ...O <sub>12</sub> )                                                                                                                 | 2.558  | 1.958 | 1.961 |
| φ(C <sub>5</sub> O <sub>11</sub> H <sub>15</sub> )                                                                                                                     | 114.7  | 111.0 | 111.2 |
| φ(C <sub>5</sub> C <sub>4</sub> C <sub>13</sub> )                                                                                                                      | 123.2  | 119.7 | 120.1 |
| φ(C <sub>4</sub> C <sub>13</sub> N <sub>14</sub> )                                                                                                                     | 140.8  | 142.0 | 142.5 |
| φ(C <sub>4</sub> C <sub>13</sub> O <sub>12</sub> )                                                                                                                     | 134.6  | 130.3 | 131.1 |
| φ(C <sub>13</sub> O <sub>12</sub> N <sub>14</sub> )                                                                                                                    | 46.1   | 45.1  | 45.4  |
| φ(O <sub>11</sub> H <sub>15</sub> ...O <sub>16</sub> )                                                                                                                 | 172.1  | -     | -     |
| φ(O <sub>11</sub> H <sub>15</sub> ...O <sub>12</sub> )                                                                                                                 | 112.5  | 142.0 | 142.5 |
| φ(O <sub>16</sub> H <sub>18</sub> ...N <sub>14</sub> ), φ(O <sub>16</sub> H <sub>18</sub> ...O <sub>11</sub> )                                                         |        | 90.0  | 152.6 |
| φ(O <sub>16</sub> H <sub>18</sub> ...O <sub>12</sub> ),                                                                                                                | 136.5  | -     | -     |
| φ(C <sub>6</sub> H <sub>10</sub> ...O <sub>16</sub> ), φ(C <sub>3</sub> H <sub>9</sub> ...O <sub>16</sub> )                                                            | -      | 154.6 | 139.2 |
| θ(O <sub>11</sub> H <sub>15</sub> ...O <sub>16</sub> H <sub>18</sub> )                                                                                                 | -177.8 | -     | 160.3 |
| θ(O <sub>16</sub> H <sub>18</sub> ...C <sub>13</sub> N <sub>14</sub> )                                                                                                 | 145.4  | 111.1 | -     |
| θ(C <sub>6</sub> H <sub>10</sub> ...O <sub>16</sub> H <sub>18</sub> ), θ(C <sub>3</sub> H <sub>9</sub> ...O <sub>16</sub> H <sub>18</sub> )                            | -      | -57.6 | -7.0  |

<sup>a</sup> the interacting atoms refer to the structure 1a presented below;  
the bond distances are given in Å, the angles in degrees.

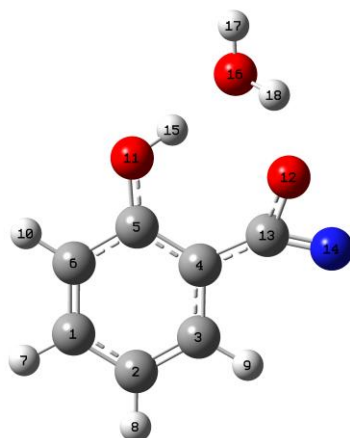



Table S14 Selected structural parameters<sup>a</sup> calculated for the C<sub>6</sub>H<sub>4</sub>(OH)NHOH-CO complexes at the B3LYPD3/6-311++G(2d,2p) level of theory.

| Property                                                                                                                                                               | 4a     | 4b     | 4c     |
|------------------------------------------------------------------------------------------------------------------------------------------------------------------------|--------|--------|--------|
| r(C <sub>17</sub> O <sub>18</sub> )                                                                                                                                    | 1.125  | 1.123  | 1.126  |
| r(C <sub>5</sub> O <sub>11</sub> )                                                                                                                                     | 1.377  | 1.373  | 1.373  |
| r(O <sub>11</sub> H <sub>12</sub> )                                                                                                                                    | 0.961  | 0.964  | 0.961  |
| r(C <sub>4</sub> N <sub>13</sub> )                                                                                                                                     | 1.409  | 1.411  | 1.410  |
| r(N <sub>13</sub> H <sub>14</sub> )                                                                                                                                    | 1.012  | 1.013  | 1.013  |
| r(N <sub>13</sub> O <sub>15</sub> )                                                                                                                                    | 1.423  | 1.431  | 1.430  |
| r(O <sub>15</sub> H <sub>16</sub> )                                                                                                                                    | 0.966  | 0.962  | 0.962  |
| r(O <sub>15</sub> H <sub>16</sub> ...C <sub>17</sub> ), r(O <sub>11</sub> H <sub>12</sub> ...C <sub>17</sub> ), r(C <sub>17</sub> ...N <sub>13</sub> H <sub>14</sub> ) | 2.322  | 2.257  | 3.766  |
| r(C <sub>3</sub> H <sub>9</sub> ...O <sub>15</sub> )                                                                                                                   | 2.482  | 2.495  | 2.480  |
| r(N <sub>13</sub> H <sub>14</sub> ...O <sub>11</sub> )                                                                                                                 | 2.317  | 2.294  | 2.306  |
| φ(C <sub>5</sub> O <sub>11</sub> H <sub>12</sub> )                                                                                                                     | 109.8  | 110.4  | 109.8  |
| φ(C <sub>4</sub> C <sub>5</sub> O <sub>11</sub> )                                                                                                                      | 116.2  | 116.3  | 116.2  |
| φ(C <sub>4</sub> N <sub>13</sub> H <sub>14</sub> )                                                                                                                     | 112.1  | 111.1  | 111.1  |
| φ(O <sub>15</sub> N <sub>13</sub> H <sub>14</sub> )                                                                                                                    | 107.1  | 106.5  | 106.6  |
| φ(C <sub>4</sub> N <sub>13</sub> O <sub>15</sub> )                                                                                                                     | 113.1  | 112.3  | 112.2  |
| φ(N <sub>13</sub> O <sub>15</sub> H <sub>16</sub> )                                                                                                                    | 102.7  | 103.2  | 103.2  |
| φ(O <sub>15</sub> H <sub>16</sub> ...C <sub>17</sub> ), φ(O <sub>11</sub> H <sub>12</sub> ...C <sub>17</sub> )                                                         | 134.6  | 170.6  | -      |
| φ(N <sub>13</sub> H <sub>14</sub> ...O <sub>11</sub> )                                                                                                                 | 99.5   | 100.9  | 100.0  |
| φ(C <sub>3</sub> H <sub>9</sub> ...O <sub>15</sub> ), φ(C <sub>17</sub> ...N <sub>13</sub> H <sub>14</sub> )                                                           | 95.5   | 94.9   | 95.2   |
| θ(H <sub>14</sub> N <sub>13</sub> O <sub>15</sub> H <sub>16</sub> )                                                                                                    | 121.1  | 116.5  | 116.1  |
| θ(C <sub>3</sub> C <sub>4</sub> N <sub>13</sub> H <sub>15</sub> )                                                                                                      | 29.6   | 151.3  | 149.3  |
| θ(C <sub>4</sub> N <sub>13</sub> O <sub>15</sub> H <sub>16</sub> )                                                                                                     | -114.8 | -121.7 | -122.0 |
| θ(N <sub>13</sub> O <sub>15</sub> H <sub>16</sub> ...C <sub>17</sub> ), θ(C <sub>5</sub> O <sub>11</sub> H <sub>12</sub> ...C <sub>17</sub> )                          | 16.5   | -173.0 | 60.8   |
| θ(O <sub>15</sub> H <sub>16</sub> ...C <sub>17</sub> O <sub>18</sub> ), θ(O <sub>11</sub> H <sub>12</sub> ...C <sub>17</sub> O <sub>18</sub> )                         | -6.0   | 3.2    | 127.1  |
| θ(N <sub>13</sub> H <sub>14</sub> ...O <sub>11</sub> H <sub>12</sub> )                                                                                                 | -163.0 | -162.2 | -157.9 |
| θ(C <sub>3</sub> H <sub>9</sub> ...O <sub>15</sub> H <sub>16</sub> )                                                                                                   | 124.7  | 127.4  | 126.2  |

<sup>a</sup> the interacting atoms refer to the structure 1a presented below;  
the bond distances are given in Å, the angles in degrees.

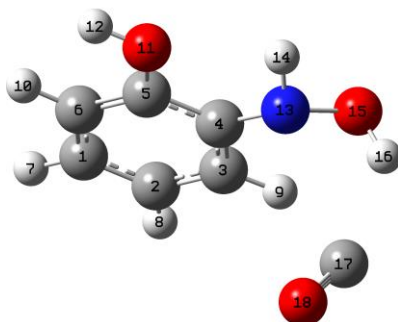

Supplement: s1 [file s1]
